# Supplementary material for: Biochemical and Genomic Characterization of the Cypermethrin-Degrading and Biosurfactant-Producing Bacterial Strains Isolated from Marine Sediments of the Chilean Northern Patagonia
Source: PubMed Central journal article supplement (PMC7281626; doi:10.3390/md18050252), 2020-05-13
Supplement: marinedrugs-18-00252-s001.pdf [file marinedrugs-18-00252-s001.pdf]

**Table S1.** Phenotypic and biochemical characteristics of cypermethrin-degrading and biosurfactant-producing bacterial strains isolated from Northern Chilean Patagonia.

| Strain                                                              | MS1   | MS4     | MS8 | MS10 | MS11    | MS12    | MS13** | MS14 | MS15a** | MS16**  | MS19**  |
|---------------------------------------------------------------------|-------|---------|-----|------|---------|---------|--------|------|---------|---------|---------|
| <b>Gram stain</b>                                                   | +     | -       | -   | -    | +       | +       | +      | +    | -       | +       | -       |
| <b>Cell morphology</b>                                              | cocci | bacilli | rod | rod  | bacilli | bacilli | rod    | rod  | bacilli | bacilli | bacilli |
| <b>Motility</b>                                                     | -     | +       | +   | +    | -       | -       | -      | -    | +       | -       | +       |
| <b>Catalase</b>                                                     | +     | +       | +   | +    | +       | +       | +      | +    | +       | +       | +       |
| <b>Cypermethrin* growth<br/>50 mg L<sup>-1</sup><br/>(OD600 nm)</b> | +     | +       | +   | +    | +       | +       | +++    | +    | +++     | +++     | +++     |
| <b>E<sub>24</sub> (%)*</b>                                          | 12    | 94      | 76  | 32   | 24      | 82      | 77     | 38   | 60      | 79      | 71      |

\* Cells grown on TSA at 28 °C for 24 h.

\*\* strains selected for genomic analysis.

**Table S2.** Identification by comparative sequence analyses of cypermethrin-degrading and biosurfactant-producing bacterial strains isolated from Northern Chilean Patagonia.

| Strain | Accession number | Closest type strain (Accession N°)                        | Score (% Identity) |
|--------|------------------|-----------------------------------------------------------|--------------------|
| MS1    | MK271075         | <i>Rhodococcus erythropolis</i> ATCC 4277<br>(AY281111.1) | 435/436 (98)       |
| MS4    | MK271077         | <i>Serratia odorifera</i> DSM 4582<br>(NR_114578.1)       | 702/730 (96)       |

|      |          |                                                           |              |
|------|----------|-----------------------------------------------------------|--------------|
| MS8  | MK271079 | <i>Pseudomonas oryzihabitans</i> LMG7040<br>(NR_117269.1) | 729/733 (99) |
| MS10 | MK271080 | <i>Pseudomonas</i> sp. DSM 12280<br>(AM088476.1)          | 700/740 (95) |
| MS11 | MK271081 | <i>Rhodococcus globerulus</i> DSM 43954<br>(NR_026184.1)  | 716/718 (99) |
| MS12 | MK271082 | <i>Rhodococcus globerulus</i> DSM 43954<br>(NR_026184.1)  | 707/709 (99) |
| MS13 | MK271083 | <i>Rhodococcus</i> sp. DSM43943<br>(X80616.1)             | 702/720 (98) |
| MS14 | MK271084 | <i>Rhodococcus</i> sp. DSM43943<br>(X80616.1)             | 696/713 (98) |
| MS15 | MK271085 | <i>Pseudomonas</i> sp. DSM 12280<br>(AM088476.1)          | 703/742 (95) |
| MS16 | MK271086 | <i>Rhodococcus globerula</i> DSM 43954<br>(NR_026184.1)   | 704/706 (99) |
| MS19 | MK271087 | <i>Pseudomonas marincola</i> KMM 3042<br>(NR_041592.1)    | 707/711 (99) |

M.S.: Marine Sediment
